# Supplementary material for: Analysis of combinatorial chemokine receptor expression dynamics using multi-receptor reporter mice
Source: eLife journal article supplement (doi:10.7554/elife.72418), 2022-06-14
Supplement: supp [file elife-72418-supp-v1.zip]

## Co-expression plots matching pie chart in Figure 5A (Ly6C<sup>hi</sup> monos in kidney):

5A) iii. Ly6C<sup>hi</sup> monocytes in kidney

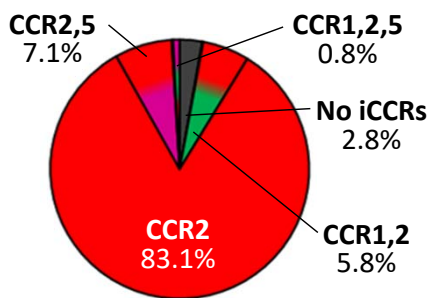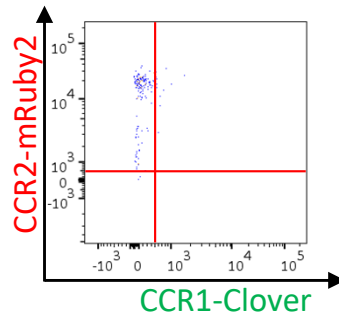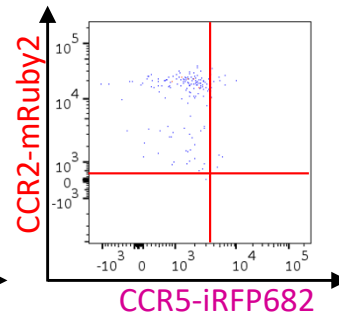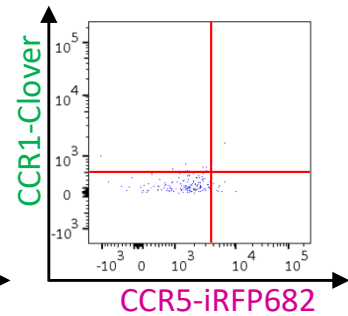

## Co-expression plots matching pie chart in Figure 5B (F480<sup>+</sup> Macs in kidney):

5B) iii. F4/80<sup>+</sup> macrophages in kidney

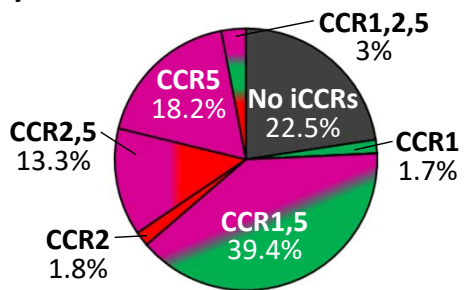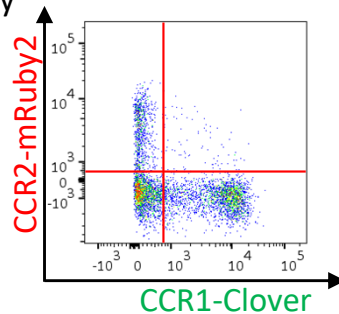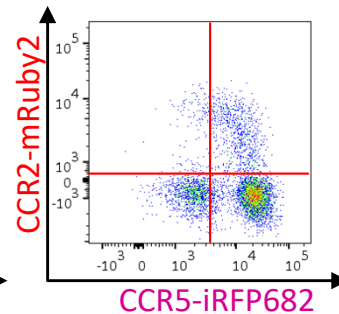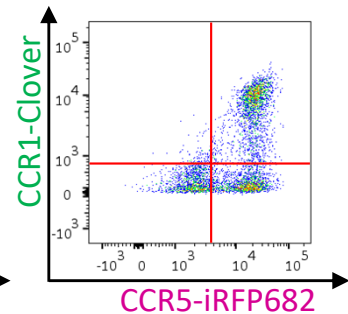

Figure 5- Figure supplement 1
