# Supplementary material for: Analysis of combinatorial chemokine receptor expression dynamics using multi-receptor reporter mice
Source: eLife journal article supplement (doi:10.7554/elife.72418), 2022-06-14
Supplement: supp [file elife-72418-supp-v1.zip]

## Co-expression plots matching pie chart in Figure 4A (Ly6C<sup>hi</sup> monos in lung):

4A) iii. Ly6C<sup>hi</sup> monocytes in lung

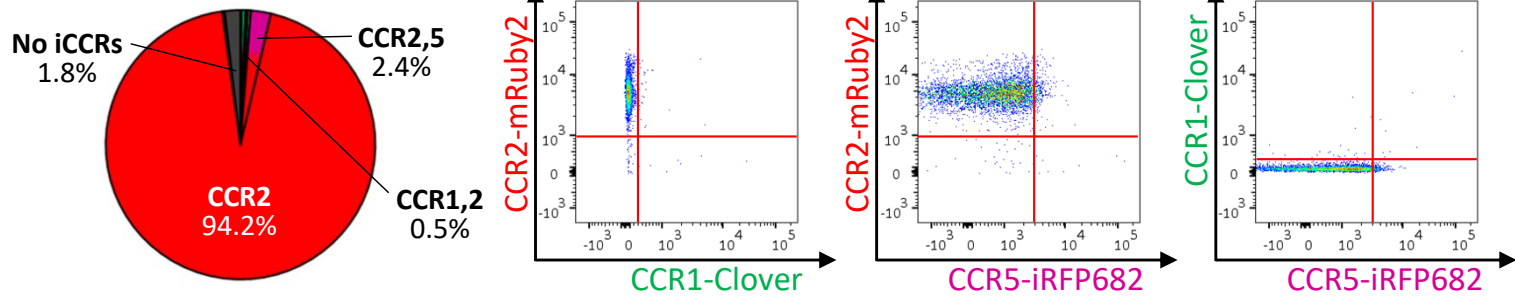

## Co-expression plots matching pie chart in Figure 4B (F480+ Macs in lung):

4B) v. F4/80<sup>+</sup> macrophages in lung

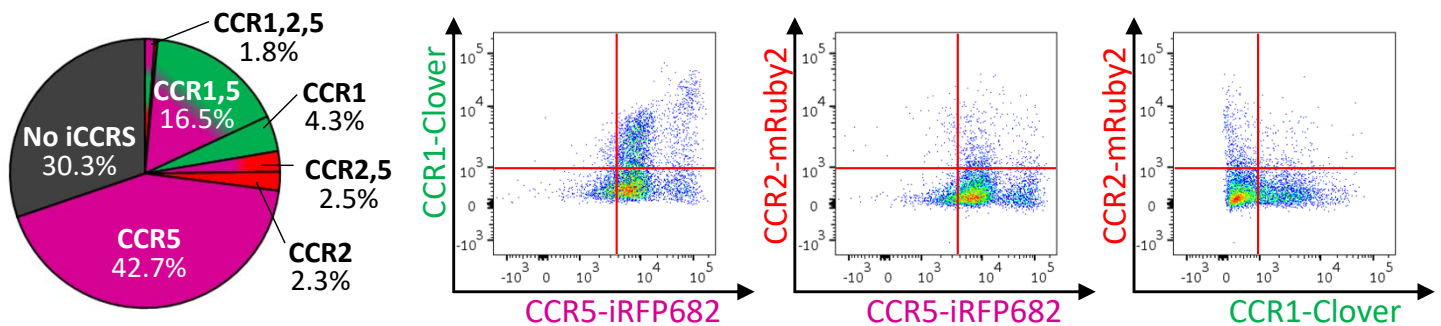

Figure 4- Figure supplement 1
