# Supplementary material for: Analysis of combinatorial chemokine receptor expression dynamics using multi-receptor reporter mice
Source: eLife journal article supplement (doi:10.7554/elife.72418), 2022-06-14

## FIXED CELLS – AIR POUCH

i. Ly6C<sup>hi</sup> monocytes in air pouch membrane

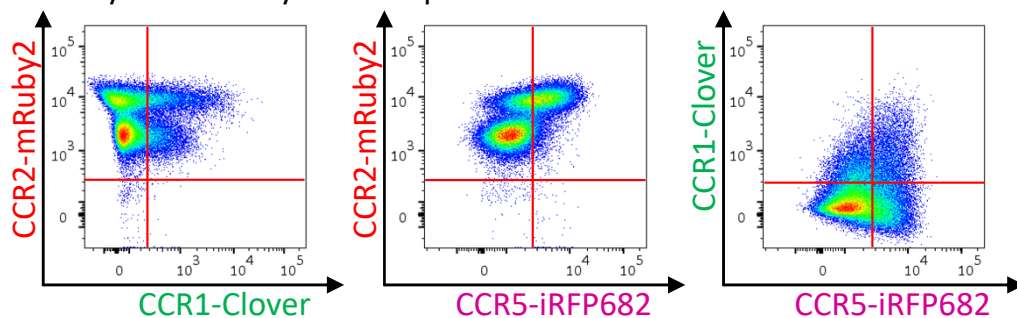

iii. F4/80<sup>+</sup> macrophages in air pouch membrane

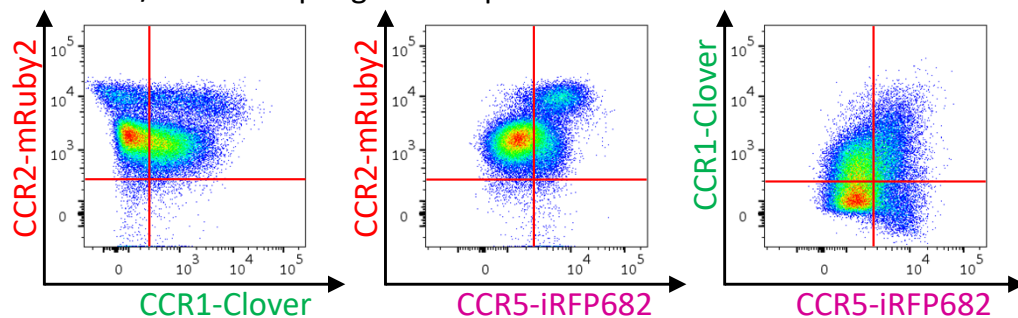

## FRESH CELLS (NOT FIXED) – AIR POUCH

i. Ly6C<sup>hi</sup> monocytes in air pouch membrane

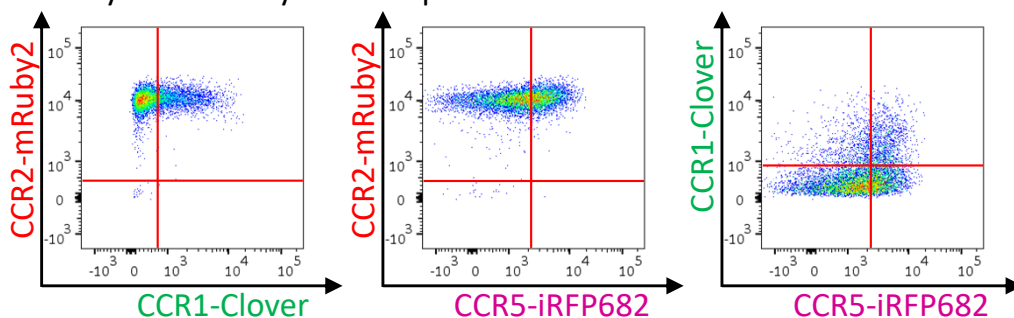

iii. F4/80<sup>+</sup> macrophages in air pouch membrane

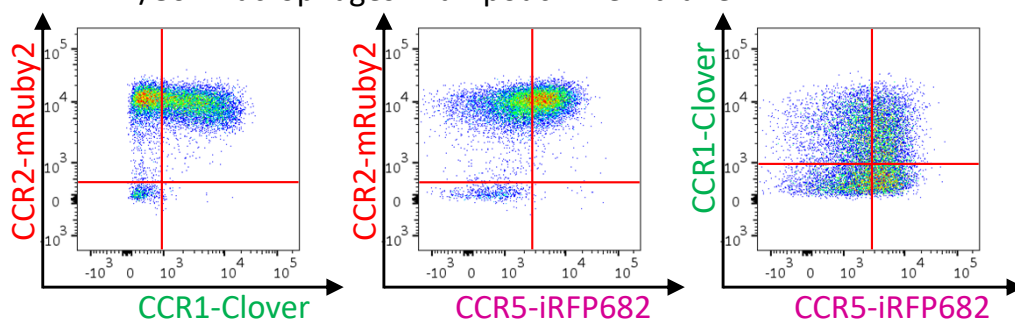

Supplement: supp [file elife-72418-supp-v1.zip]
