# Supplementary material for: Analysis of combinatorial chemokine receptor expression dynamics using multi-receptor reporter mice
Source: eLife journal article supplement (doi:10.7554/elife.72418), 2022-06-14
Supplement: supp [file elife-72418-supp-v1.zip]

**A) i. Resting Bone Marrow**

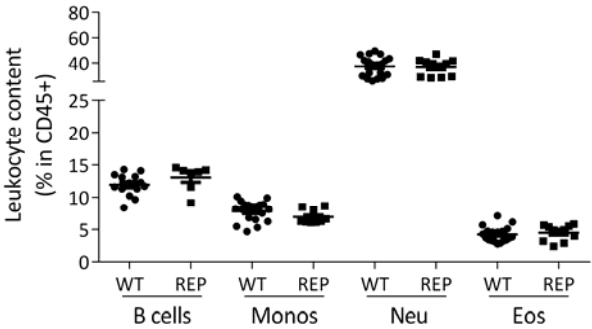

**ii. Resting Lung**

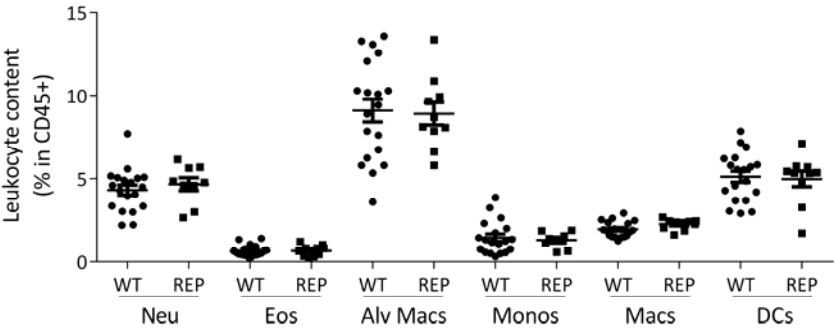

**iii. Resting Blood**

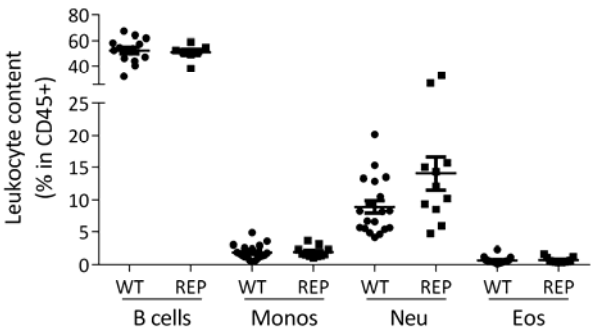

**iv. Resting Spleen**

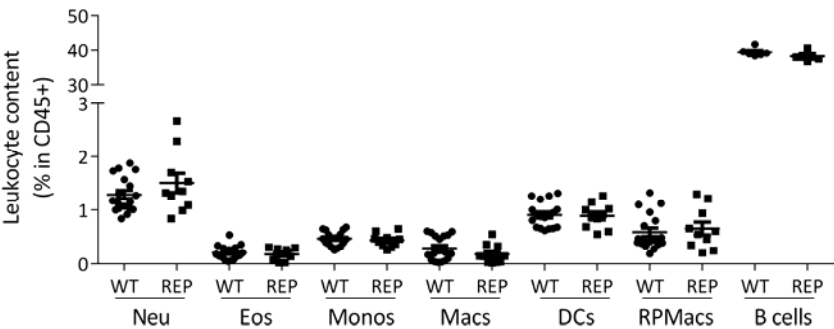

**v. Resting Kidney**

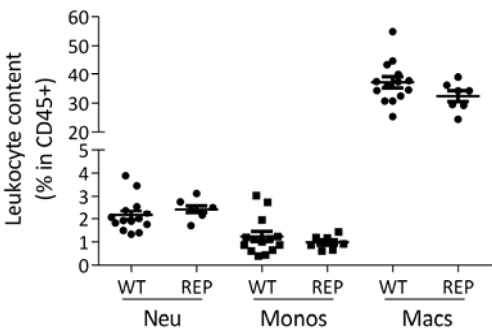

**Figure 1- Figure supplement 3**
