# Supplementary material for: Analysis of combinatorial chemokine receptor expression dynamics using multi-receptor reporter mice
Source: eLife journal article supplement (doi:10.7554/elife.72418), 2022-06-14
Supplement: supp [file elife-72418-supp-v1.zip]

## Co-expression plots matching pie charts in Figure 9B:

### 9B) i. Ly6C<sup>hi</sup> monocytes - PBS

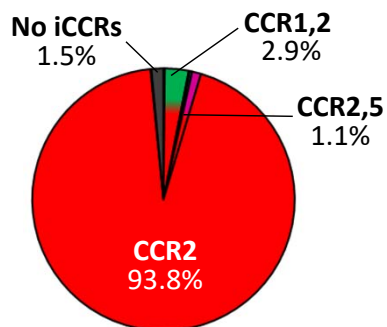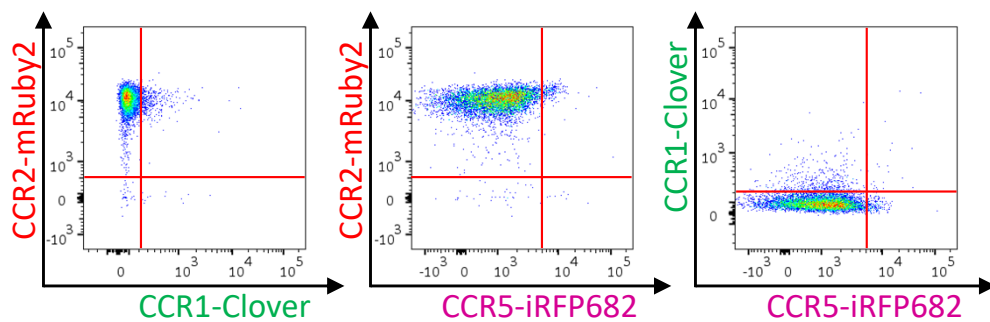

### ii. Ly6C<sup>hi</sup> monocytes - LPS

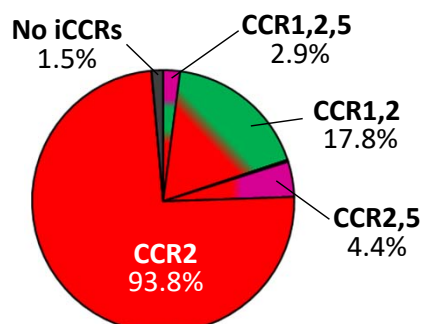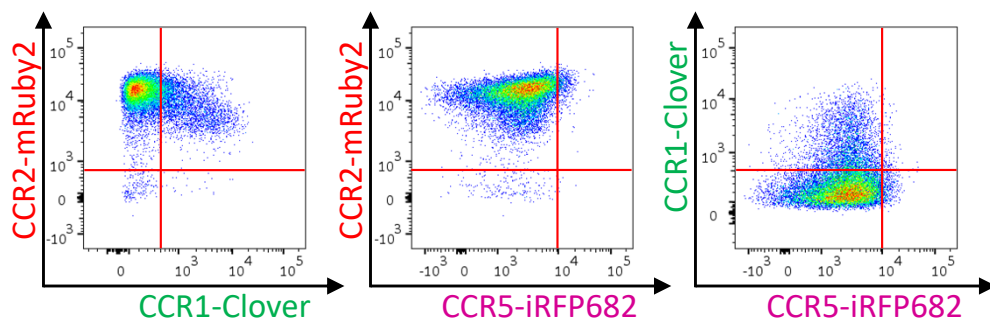

### 9C) i. F4/80<sup>+</sup> macrophages - PBS

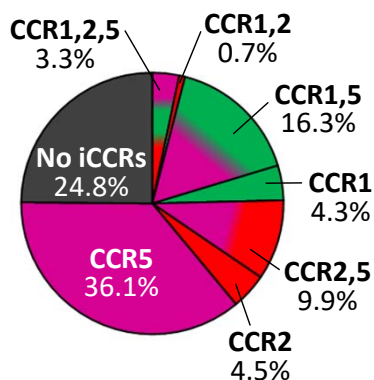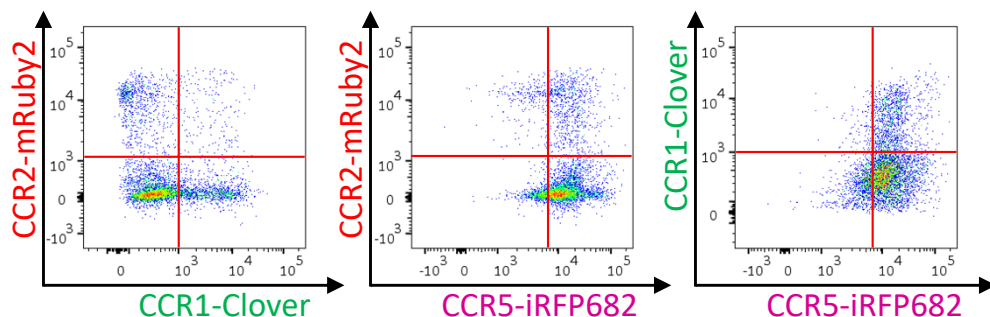

### ii. F4/80<sup>+</sup> macrophages - LPS

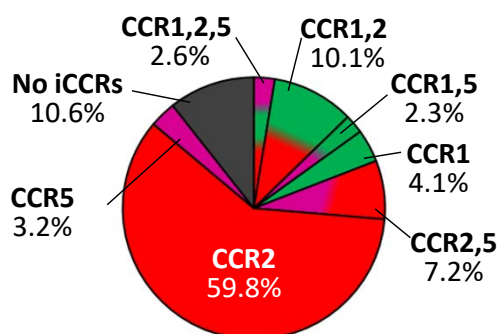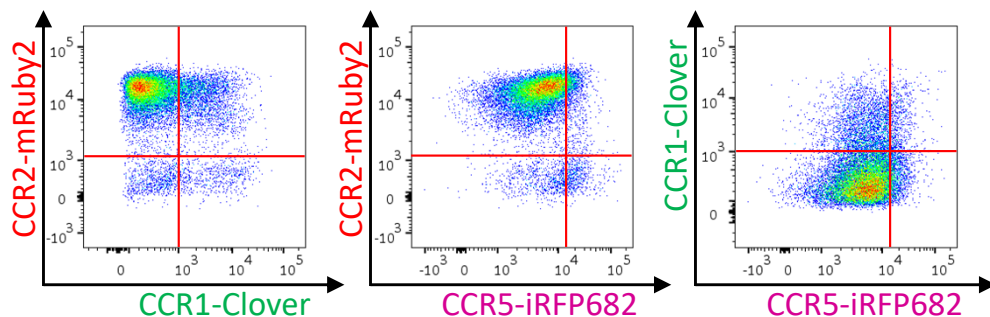

Figure 9- Figure supplement 2
