# Supplementary figures and images for: Analysis of combinatorial chemokine receptor expression dynamics using multi-receptor reporter mice
Source: eLife journal article supplement (doi:10.7554/elife.72418), 2022-06-14

## A) SPLEEN

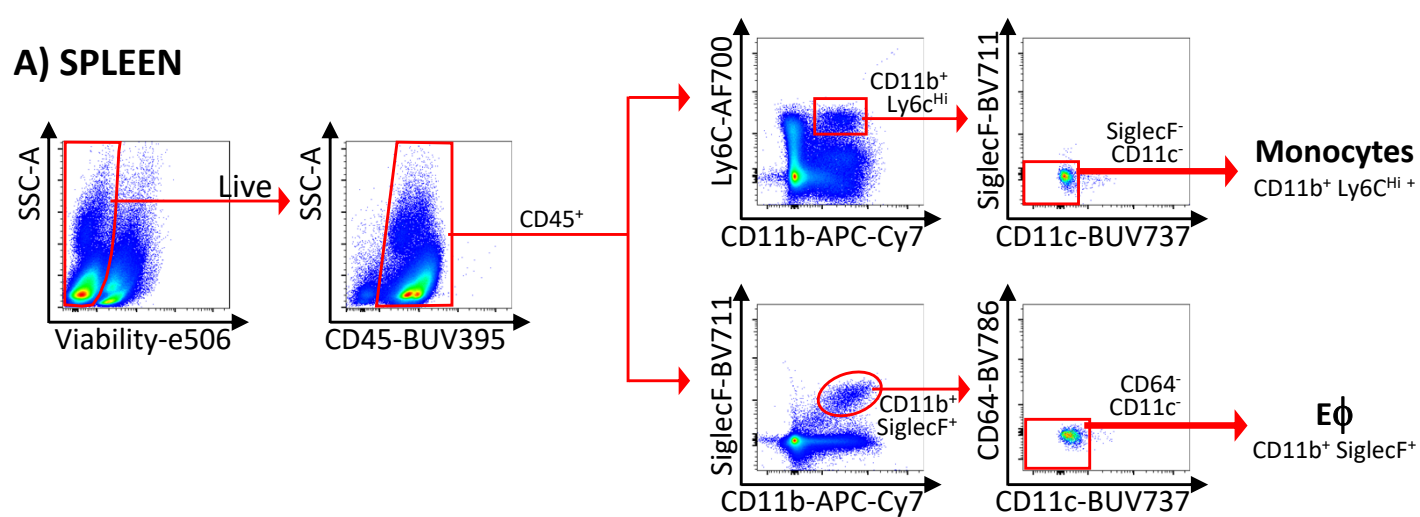

## B) BONE MARROW AND BLOOD

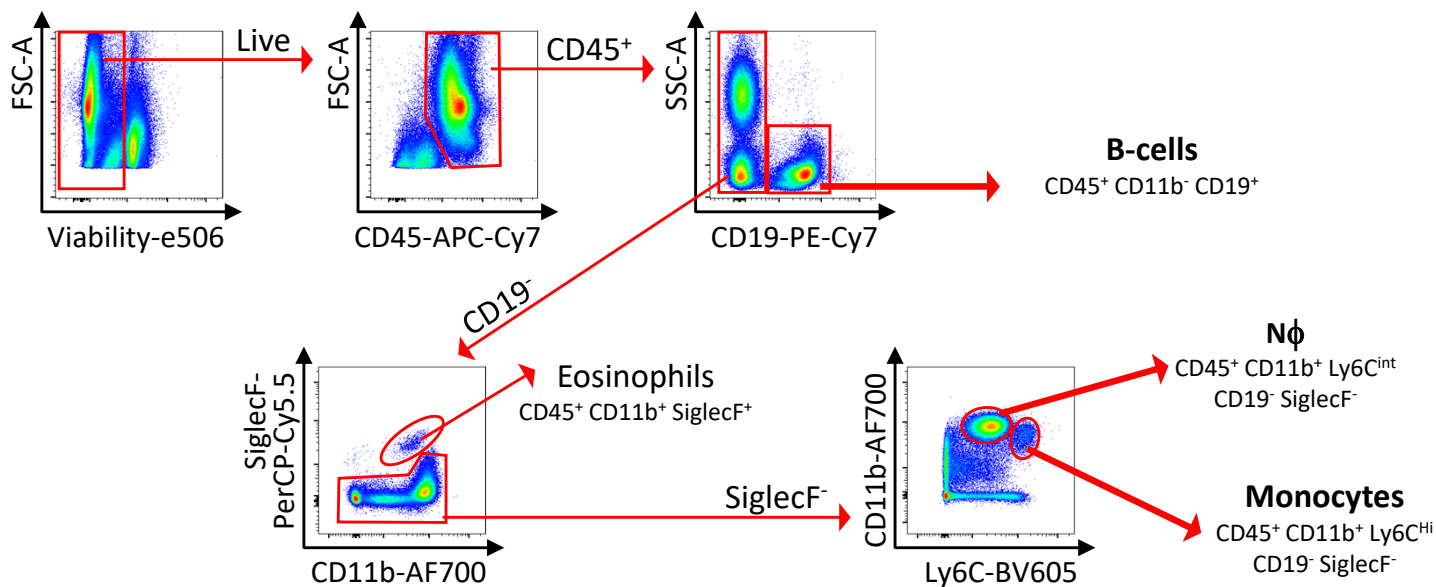

## C) AIR POUCH MEMBRANE

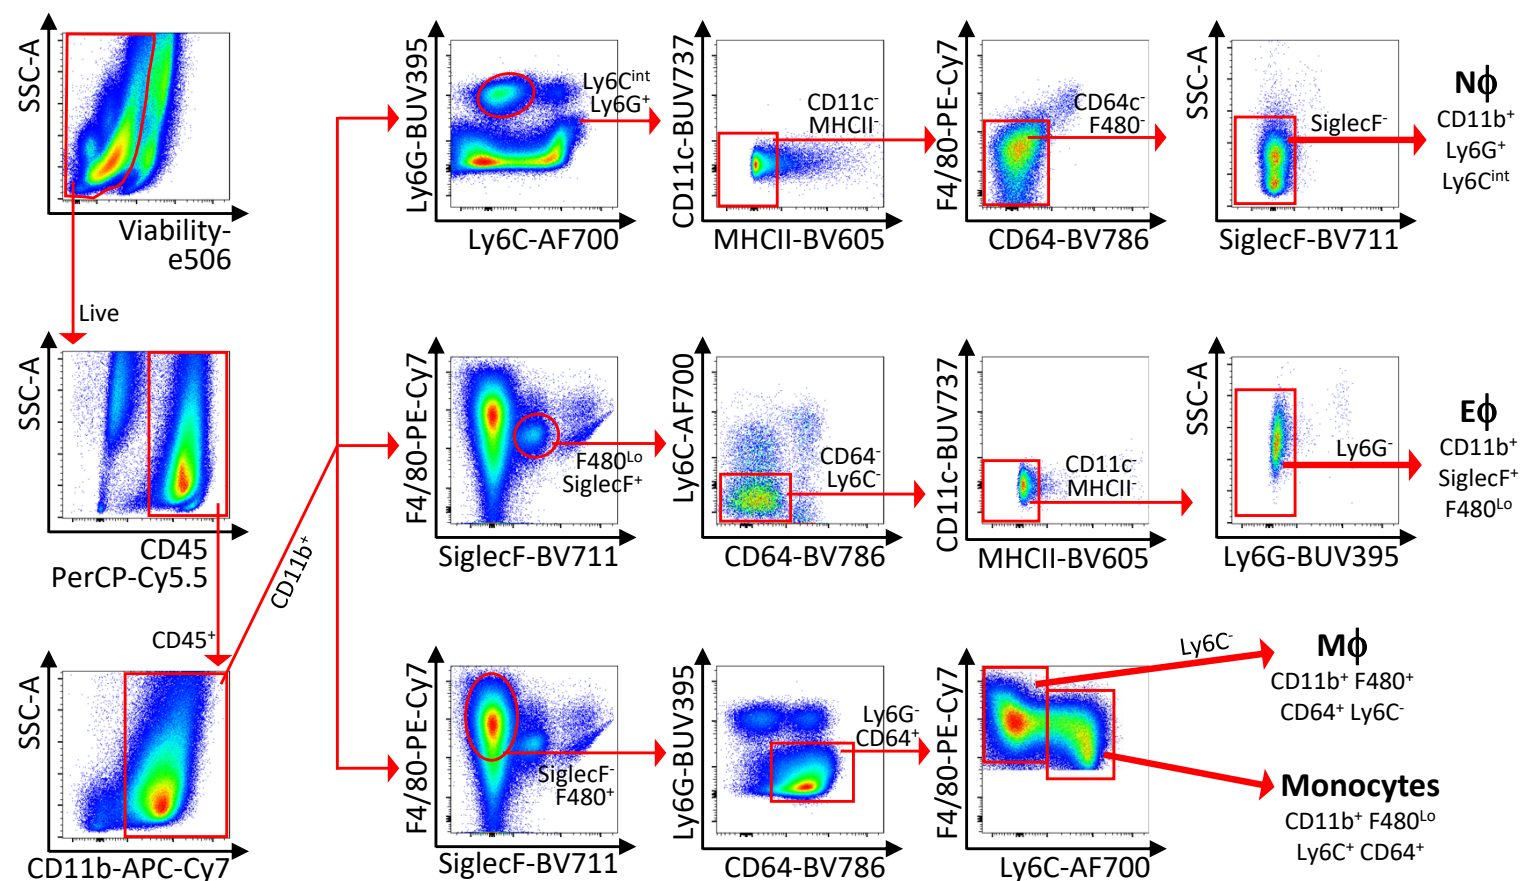

**Figure 1- Figure supplement 1**

Supplement: supp [file elife-72418-supp-v1.zip]

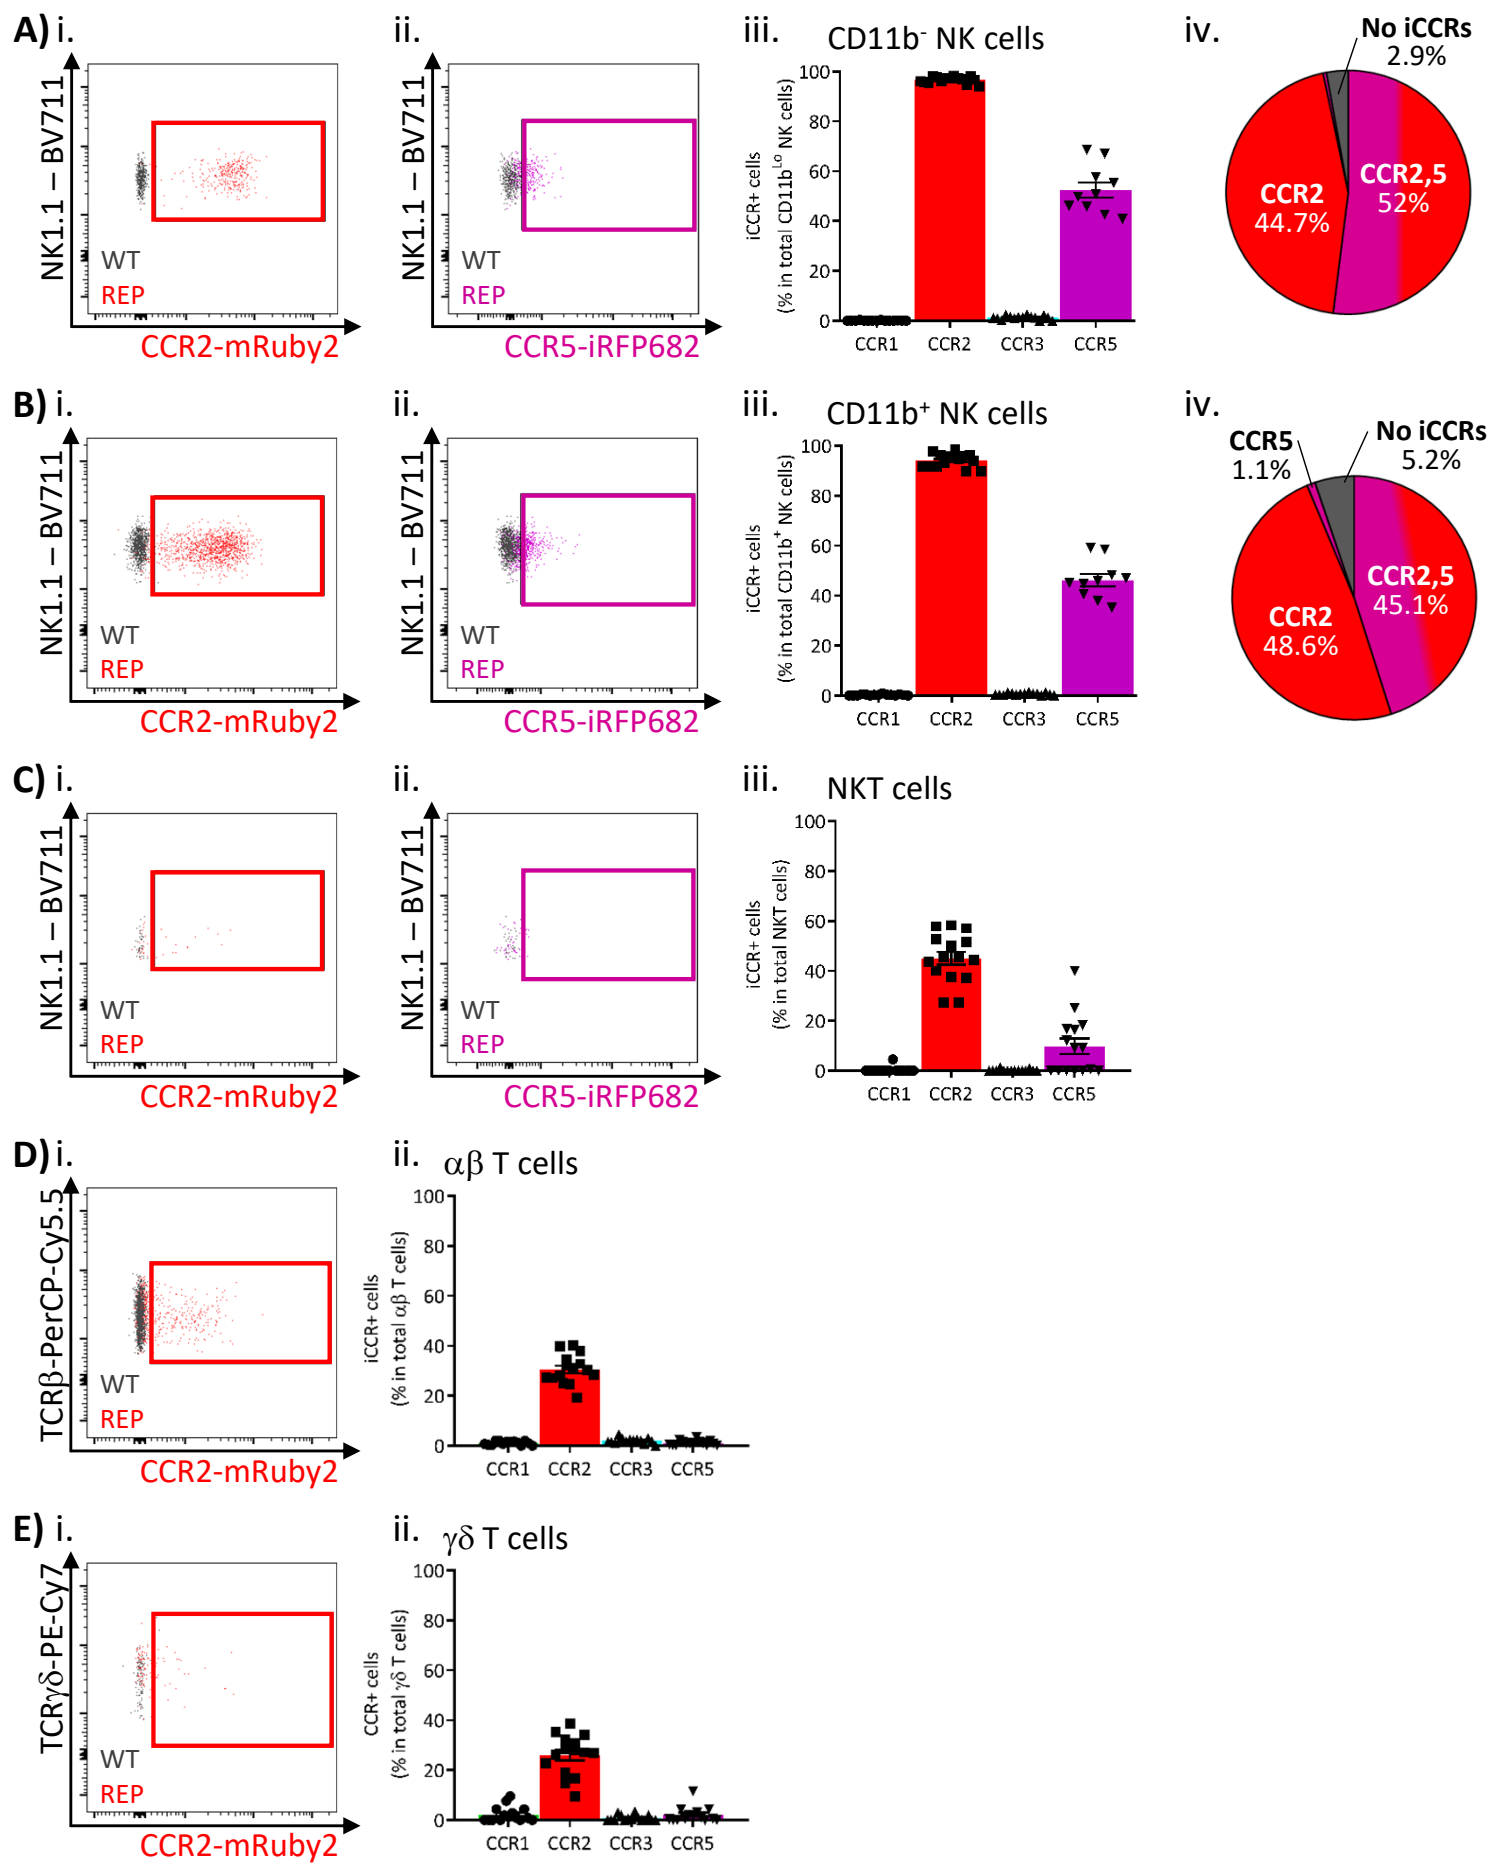

**Figure 8- Figure supplement 2**

Supplement: supp [file elife-72418-supp-v1.zip]

## A) LUNG

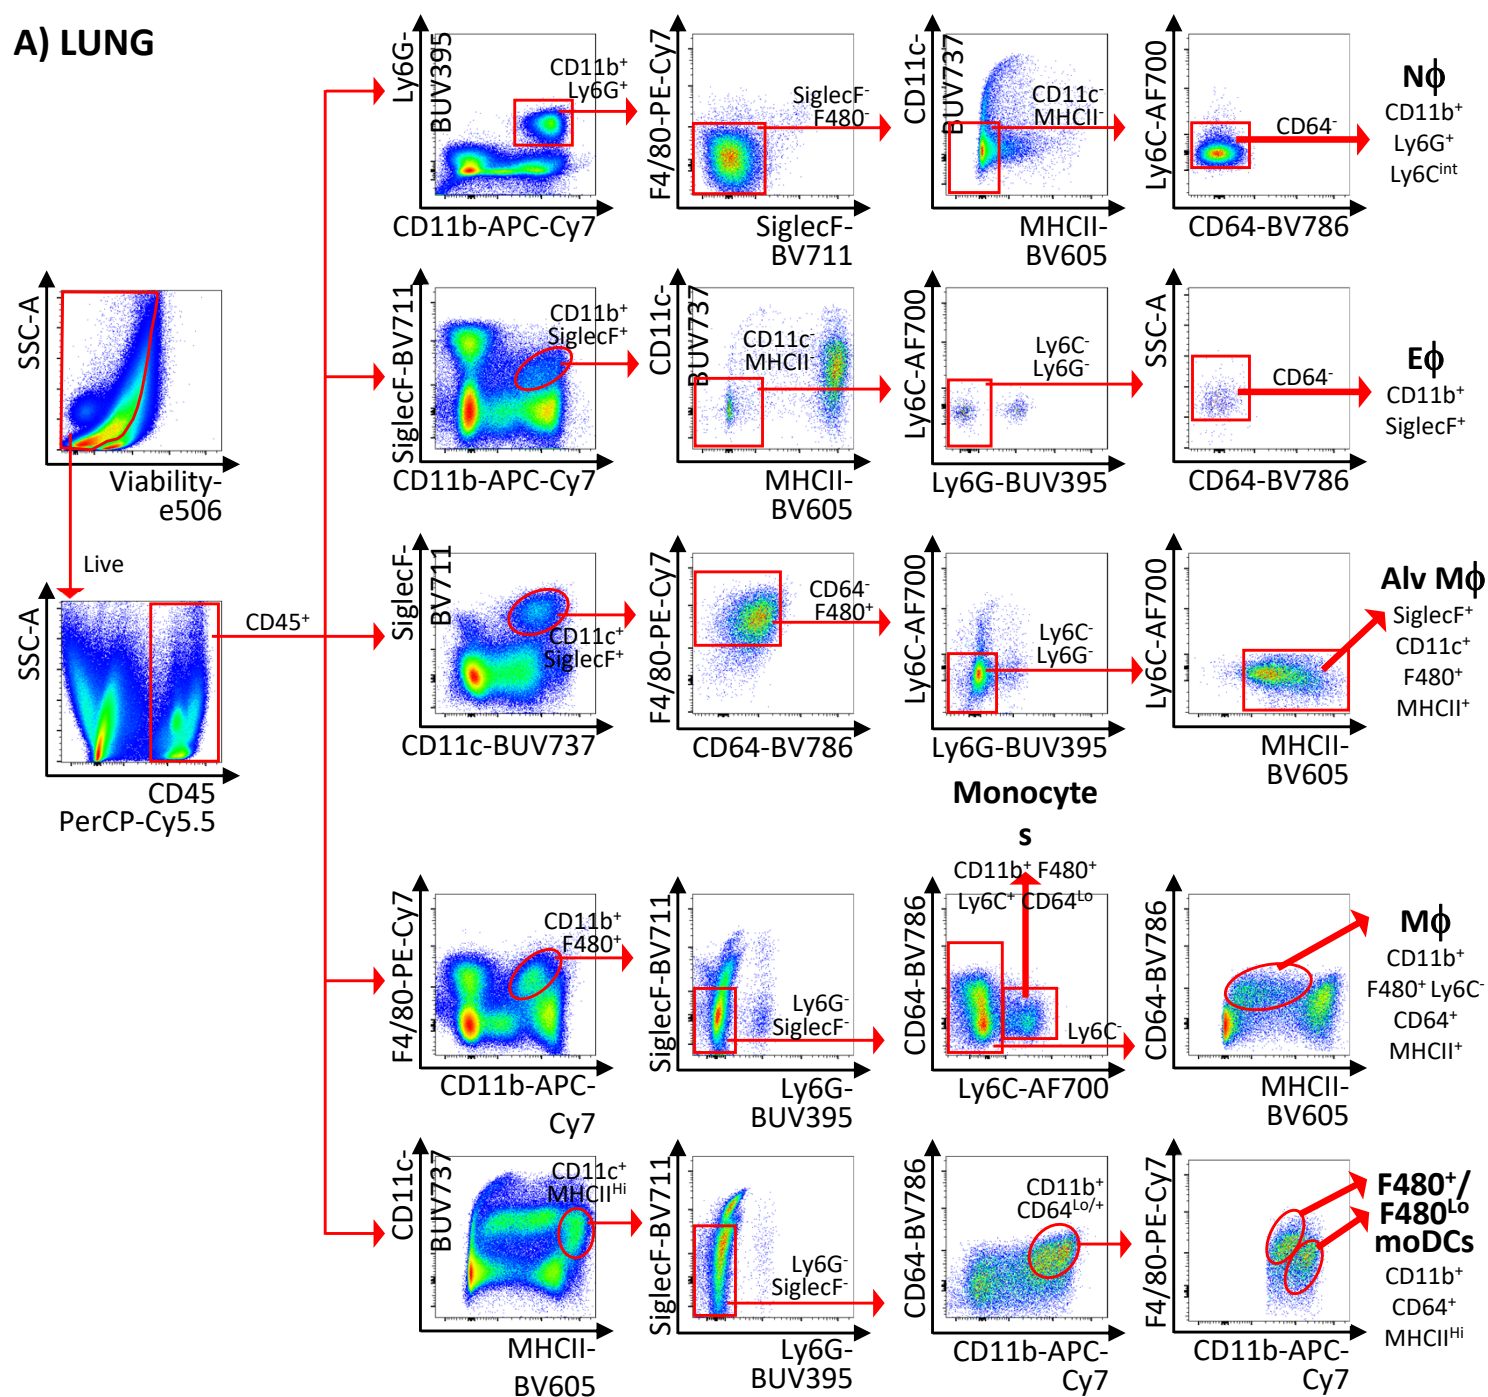

## B) KIDNEY

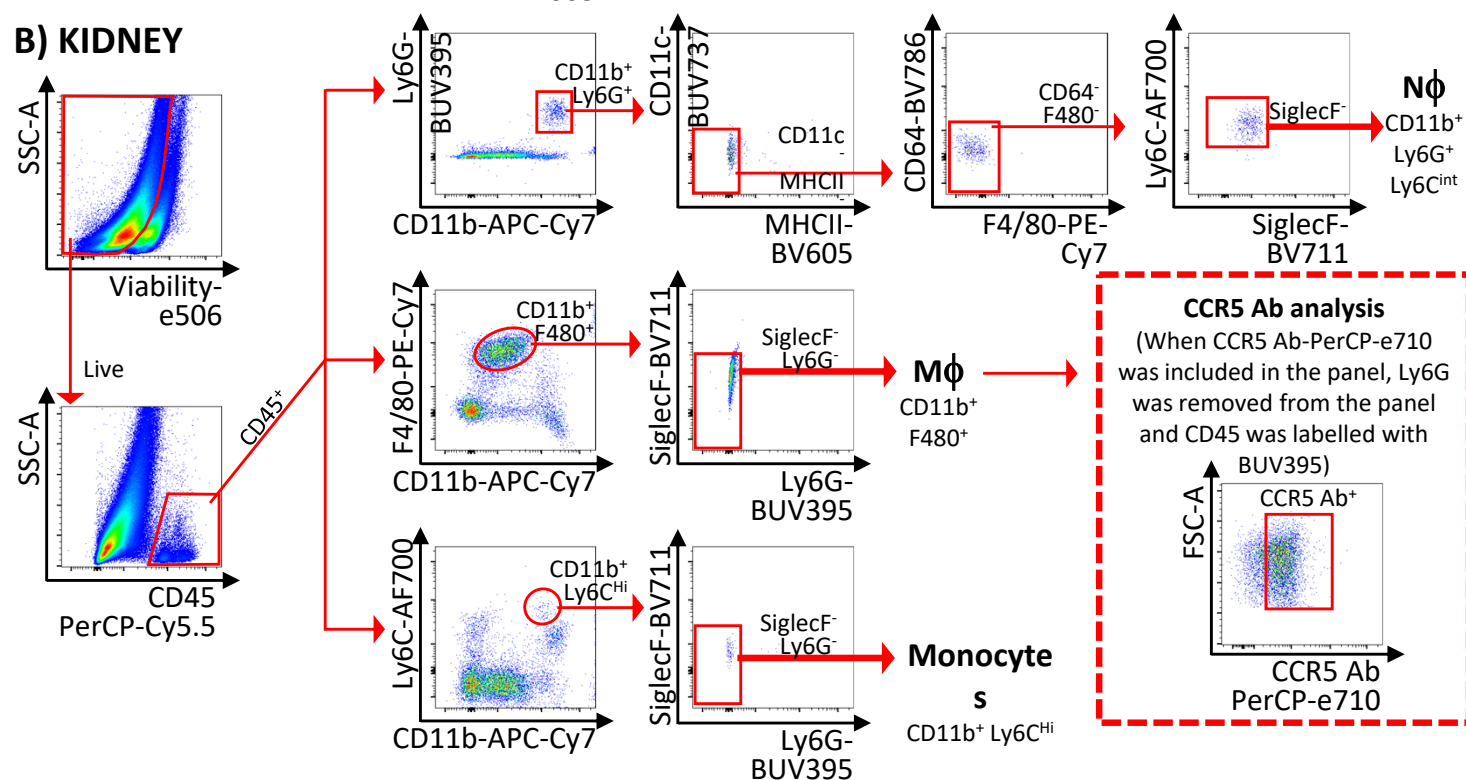

**Figure 1- Figure supplement 2**

Supplement: supp [file elife-72418-supp-v1.zip]

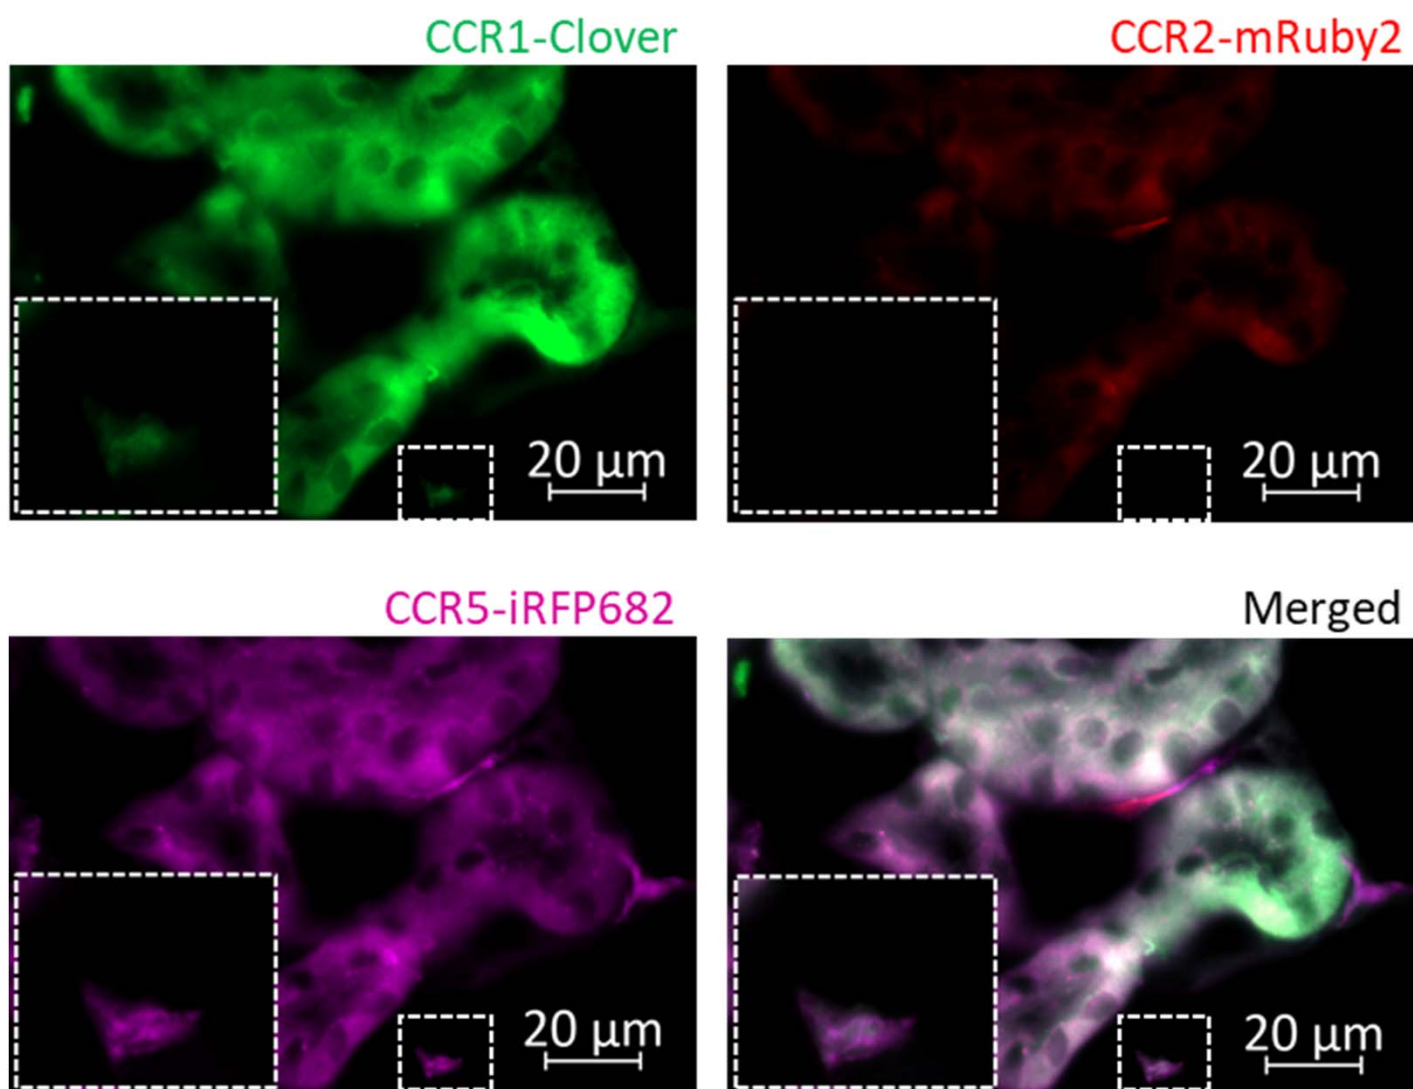

Figure 5- Figure supplement 2

Supplement: supp [file elife-72418-supp-v1.zip]

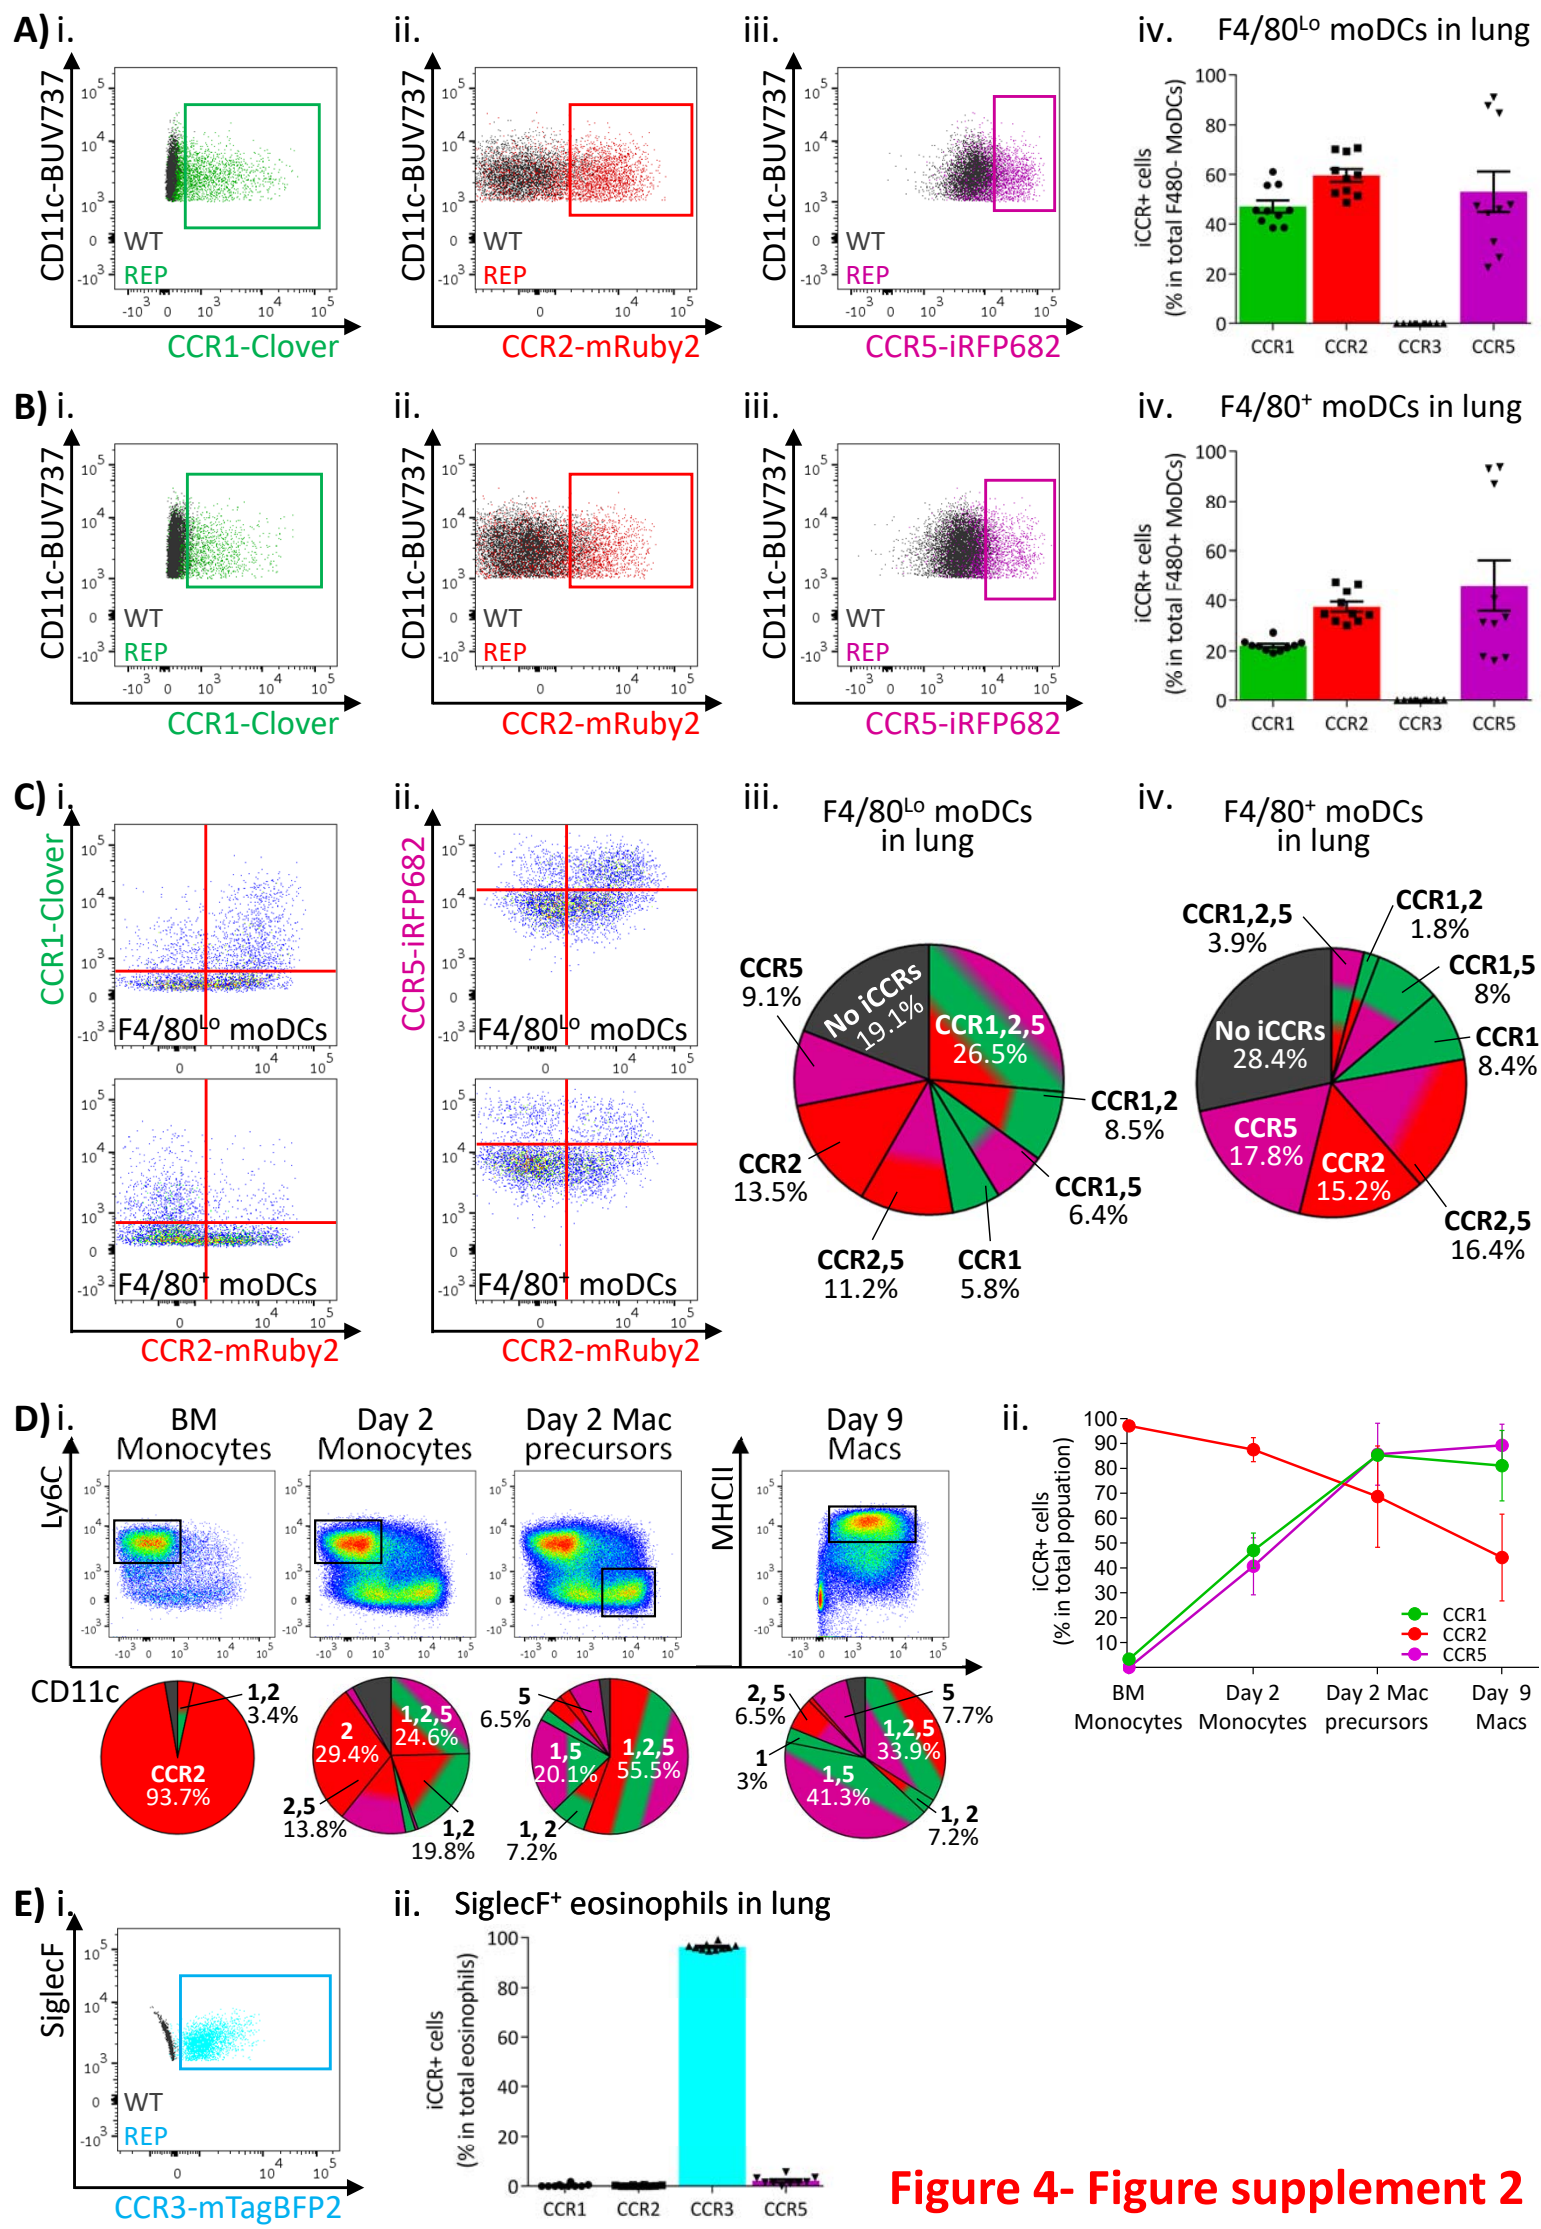

**Figure 4- Figure supplement 2**

Supplement: supp [file elife-72418-supp-v1.zip]

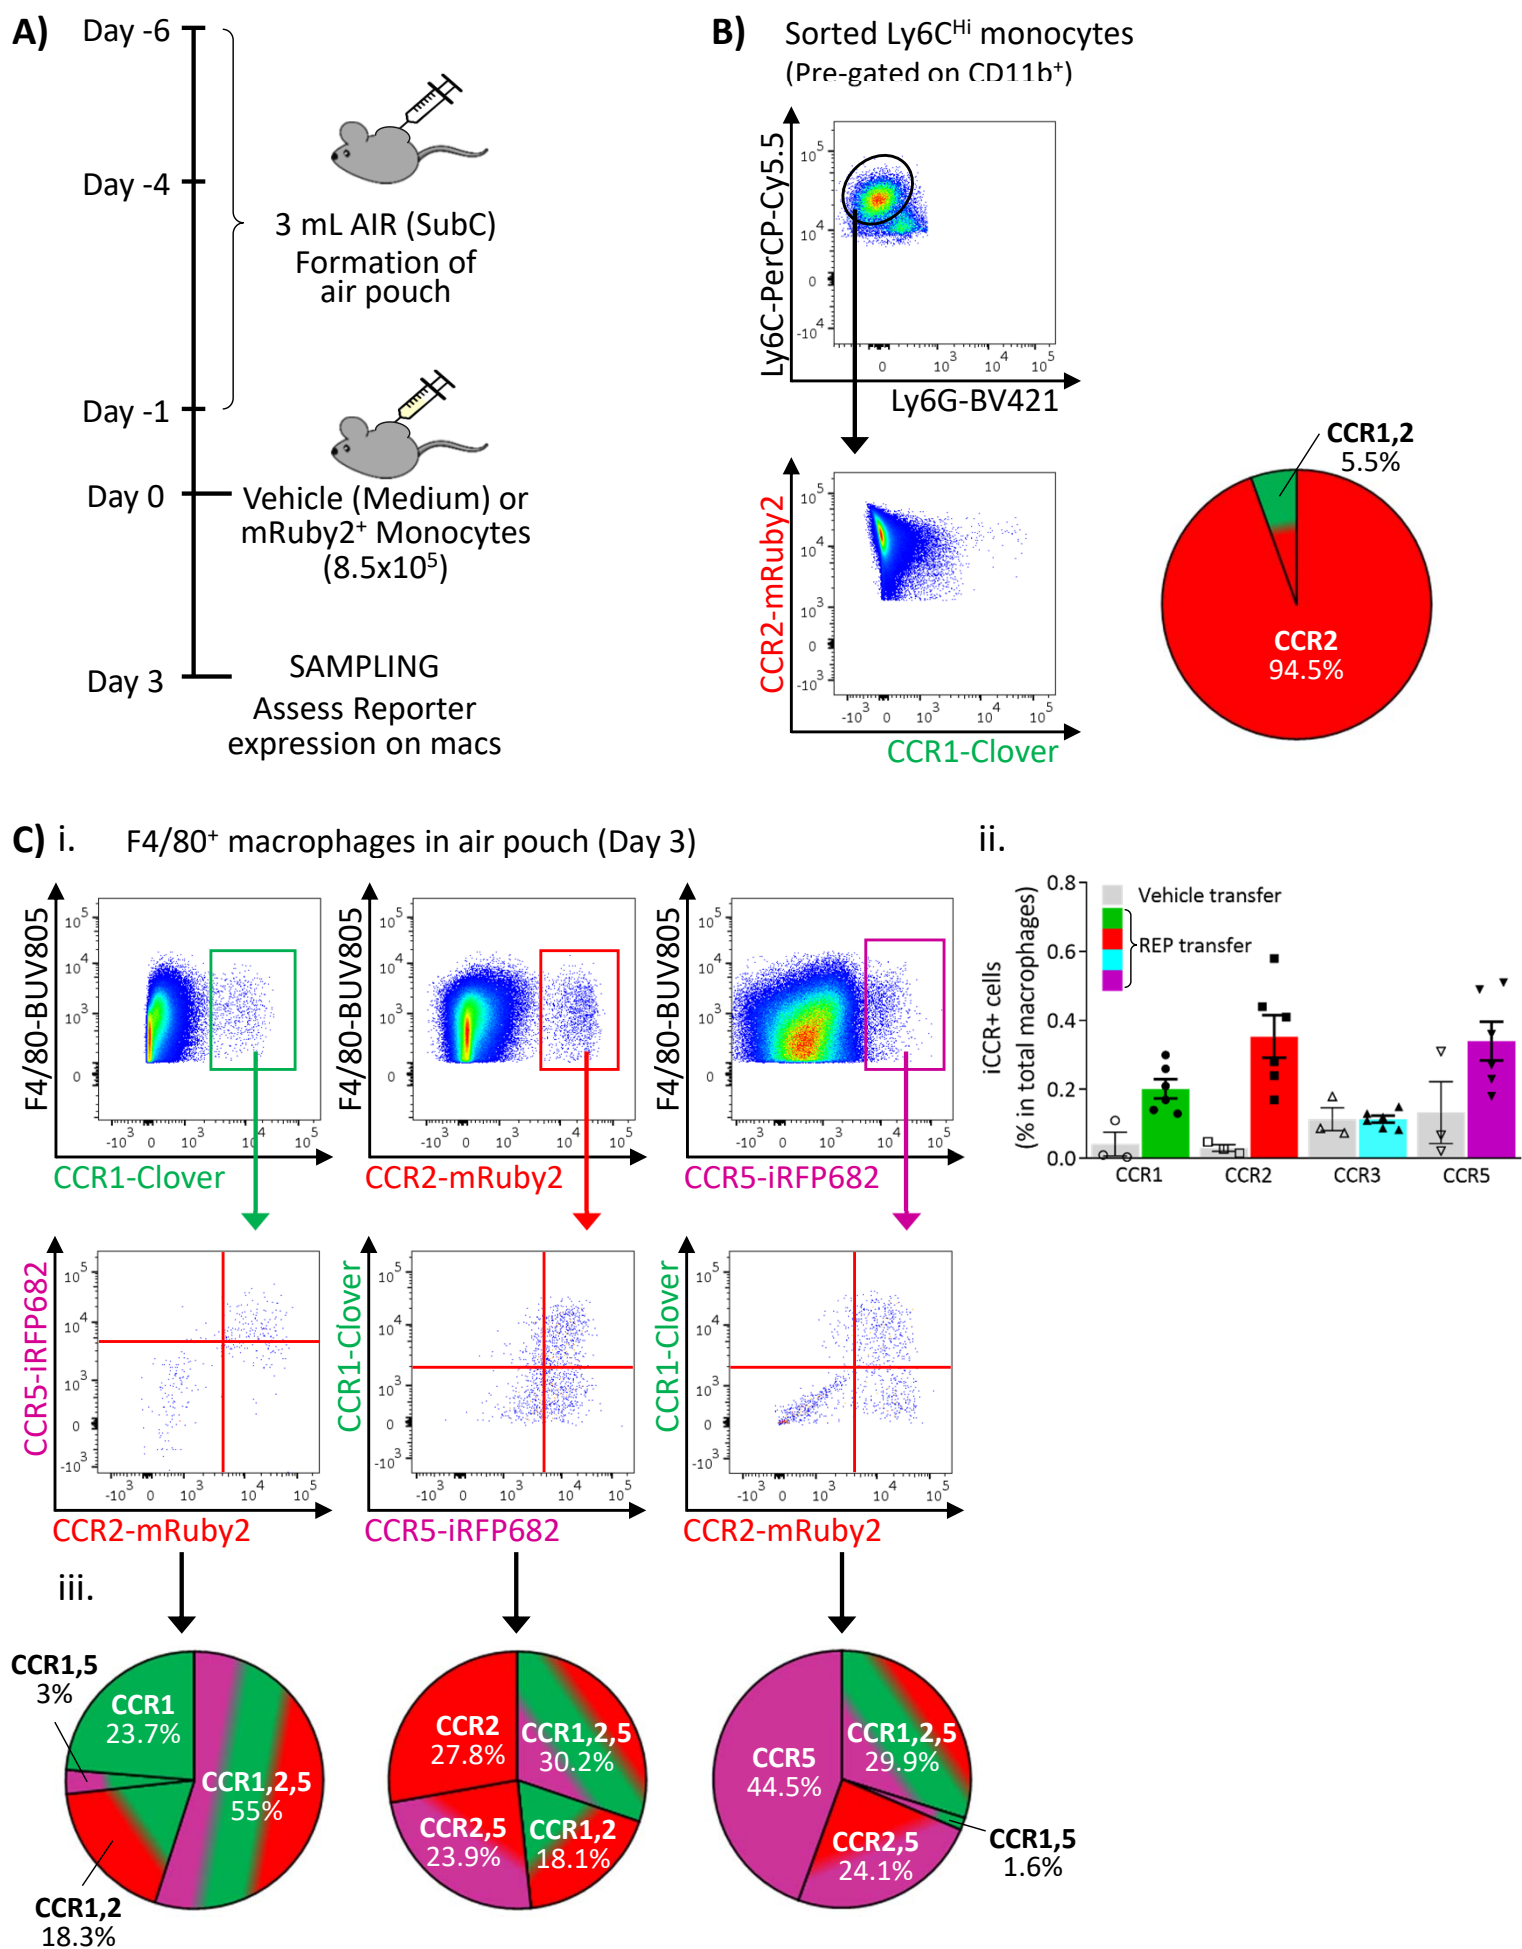

**Figure 4- Figure supplement 3**

Supplement: supp [file elife-72418-supp-v1.zip]

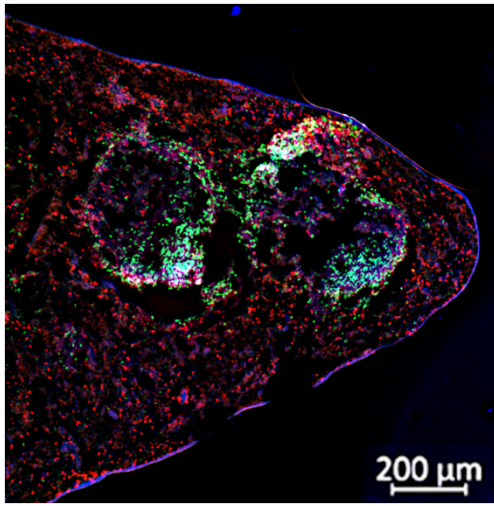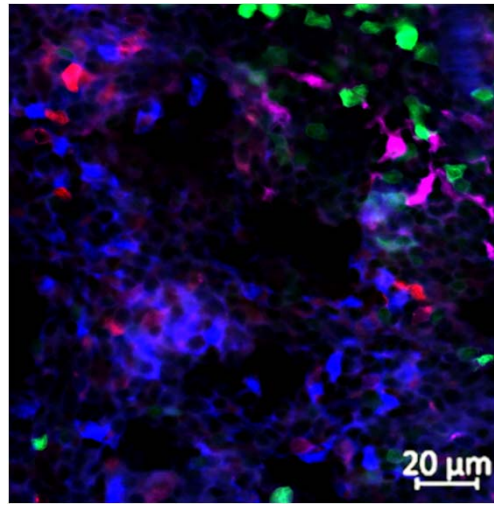

CCR1-Clover  
CCR2-mRuby2  
CCR3-mTagBFP2  
CCR5-iRFP682

Figure 4- Figure supplement 5

Supplement: supp [file elife-72418-supp-v1.zip]

### A) PBS-treated lung

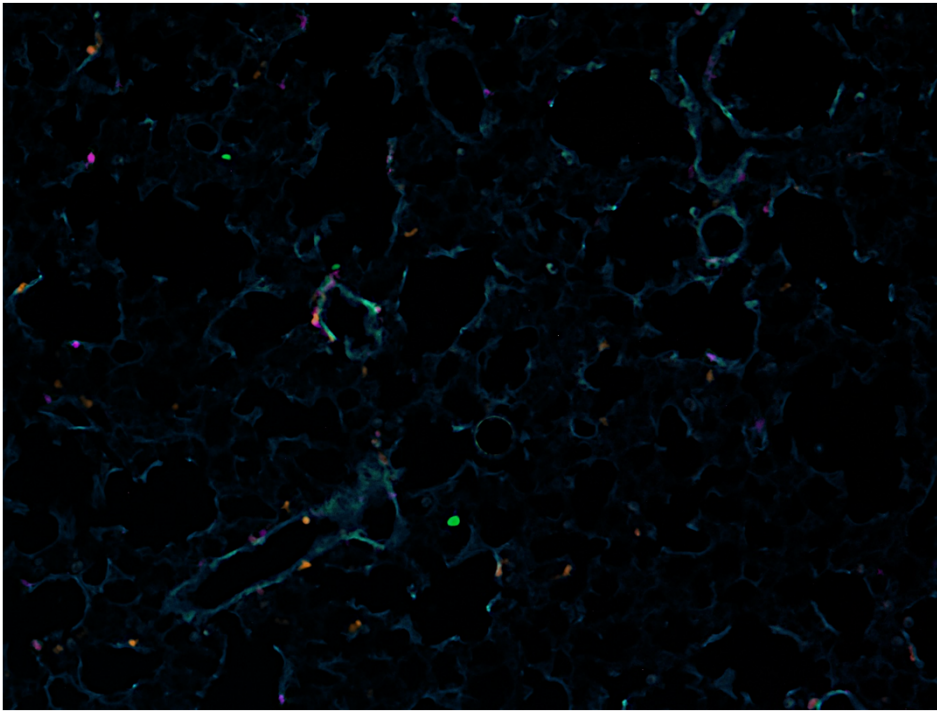

### B) LPS-treated lung

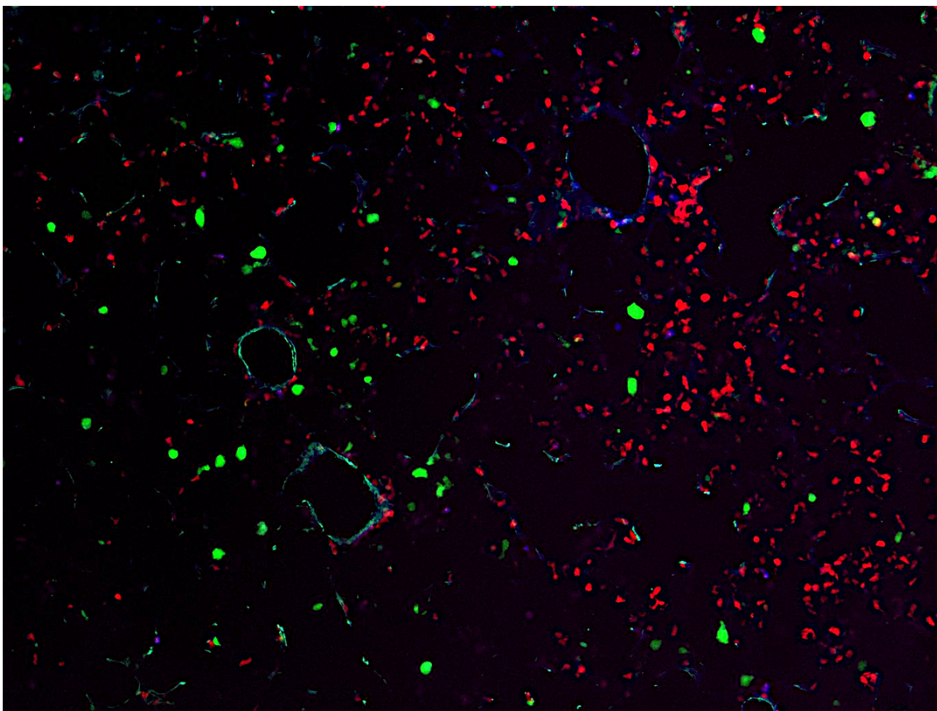

CCR1-Clover  
CCR2-mRuby2  
CCR3-mTagBFP2  
CCR5-iRFP682

Supplement: supp [file elife-72418-supp-v1.zip]
